# Supplementary material for: Investigation and manipulation of metabolically active methanogen community composition during rumen development in black goats
Source: PubMed Central journal article supplement (PMC5428682; doi:10.1038/s41598-017-00500-5), 2017-03-24

## Supplementary Information

### Investigation and manipulation of metabolically active methanogen community composition during rumen development in black goats

Zuo Wang <sup>1,2,3</sup>, Chijioke Elekwachi <sup>3</sup>, Jinzhen Jiao <sup>1</sup>, Min Wang <sup>1\*</sup>, Shaoxun Tang <sup>1</sup>, Chuanshe Zhou <sup>1</sup>, Zhiliang Tan <sup>1</sup>, and Robert J. Forster <sup>3\*</sup>

<sup>1</sup> Key Laboratory for Agro-Ecological Processes in Subtropical Region, Hunan Research Center of Livestock & Poultry Sciences, South-Central Experimental Station of Animal Nutrition and Feed Science in Ministry of Agriculture, Institute of Subtropical Agriculture, Chinese Academy of Sciences, Changsha, Hunan 410125, China

<sup>2</sup> University of Chinese Academy of Sciences, Beijing 100049, China

<sup>3</sup> Lethbridge Research and Development Centre, Agriculture and Agri-Food Canada, Lethbridge, AB T1J 4B1, Canada

\* Corresponding authors: Min Wang. Address: Institute of Subtropical Agriculture, the Chinese Academy of Sciences, Changsha, Hunan 410125, China. E-mail: [mwang@isa.ac.cn](mailto:mwang@isa.ac.cn); Tel: (86)-731-84619702; Fax: (86)-731-84612685. Robert J. Forster. Address: Lethbridge Research and Development Centre, Agriculture and Agri-Food Canada, Lethbridge, AB T1J 4B1, Canada. E-mail: [robert.forster@agr.gc.ca](mailto:robert.forster@agr.gc.ca); Tel: (001)-403-317-2292; Fax: (001)-403-382-3156.

#### Contents:

**Supplementary Tables**

**Supplementary Figures**

**Supplementary Table S1. Comparison of methanogen copy numbers (Log<sub>10</sub> copies/ μL cDNA) between control diet treatment and rhubarb supplementation**

**treatment** SEM <sup>1</sup> represents SEM for fraction × age; <sup>2</sup>NS = not significant (P > 0.05); <sup>3</sup> C = control diet treatment; <sup>4</sup> R = rhubarb supplementation treatment.

| Fraction | Diet           | Age (d) |        | SEM <sup>1</sup> | Significance (P <) <sup>2</sup> |     |            |
|----------|----------------|---------|--------|------------------|---------------------------------|-----|------------|
|          |                | 50      | 60     |                  | Diet                            | Age | Age × Diet |
| RS       | C <sup>3</sup> | 8.9890  | 8.4584 | 0.2173           | NS                              | NS  | NS         |
|          | R <sup>4</sup> | 8.6309  | 8.9187 |                  |                                 |     |            |
| RL       | C              | 6.9032  | 6.0128 |                  |                                 | NS  |            |
|          | R              | 6.2425  | 5.5796 |                  |                                 |     |            |
| RP       | C              | 7.4837  | 7.4950 |                  |                                 | NS  |            |
|          | R              | 7.9907  | 7.4648 |                  |                                 |     |            |
| RE       | C              | 6.1004  | 5.8813 |                  |                                 | NS  |            |
|          | R              | 5.4840  | 5.4740 |                  |                                 |     |            |

**Supplementary Table S2. Dual index amplicon primers for methanogens.**

| Code     | Sequence                                                                        | Barcode        |
|----------|---------------------------------------------------------------------------------|----------------|
| MARead1  | TATGGTAATT GG AGGAATTGGCGGGGGAGCAC                                              |                |
| MA.Read2 | AGTCAGTCAGCC GCGGTGTGTGCAAGGAGC                                                 |                |
| MA.Index | GCTCCTTGCACACACCGCGGTGACTGACT                                                   |                |
| MA.SA501 | AATGATACGGCGACCACCGAGATCTACAC <b>ATCGTACG</b> TATGGTAATTGGAGGAATTGGCGGGGGAGCAC  | SA501 ATCGTACG |
| MA.SA502 | AATGATACGGCGACCACCGAGATCTACAC <b>ACTATCTG</b> TATGGTAATTGGAGGAATTGGCGGGGGAGCAC  | SA502 ACTATCTG |
| MA.SA503 | AATGATACGGCGACCACCGAGATCTACAC <b>TAGCGAGT</b> TATGGTAATTGGAGGAATTGGCGGGGGAGCAC  | SA503 TAGCGAGT |
| MA.SA504 | AATGATACGGCGACCACCGAGATCTACAC <b>CTGCGTGT</b> TATGGTAATTGGAGGAATTGGCGGGGGAGCAC  | SA504 CTGCGTGT |
| MA.SA505 | AATGATACGGCGACCACCGAGATCTACAC <b>TCATCGAG</b> TATGGTAATTGGAGGAATTGGCGGGGGAGCAC  | SA505 TCATCGAG |
| MA.SA506 | AATGATACGGCGACCACCGAGATCTACAC <b>CGTGAGTG</b> TATGGTAATTGGAGGAATTGGCGGGGGAGCAC  | SA506 CGTGAGTG |
| MA.SA507 | AATGATACGGCGACCACCGAGATCTACAC <b>GGATATCT</b> TATGGTAATTGGAGGAATTGGCGGGGGAGCAC  | SA507 GGATATCT |
| MA.SA508 | AATGATACGGCGACCACCGAGATCTACAC <b>GACACCGT</b> TATGGTAATTGGAGGAATTGGCGGGGGAGCAC  | SA508 GACACCGT |
| v4.SA701 | CAAGCAGAAGACGGCATAACGAGAT <b>AACTCTCG</b> AGTCAGTCAGCCGCGGTGTGTGCAAGGAGC        | SA701 AACTCTCG |
| v4.SA702 | CAAGCAGAAGACGGCATAACGAGAT <b>ACTATGTC</b> AGTCAGTCAGCCGCGGTGTGTGCAAGGAGC        | SA702 ACTATGTC |
| v4.SA703 | CAAGCAGAAGACGGCATAACGAGAT <b>AGTAGCGT</b> AGTCAGTCAGCCGCGGTGTGTGCAAGGAGC        | SA703 AGTAGCGT |
| v4.SA704 | CAAGCAGAAGACGGCATAACGAGAT <b>CAGTGAGT</b> AGTCAGTCAGCCGCGGTGTGTGCAAGGAGC        | SA704 CAGTGAGT |
| v4.SA705 | CAAGCAGAAGACGGCATAACGAGAT <b>CGTACTCA</b> AGTCAGTCAGCCGCGGTGTGTGCAAGGAGC        | SA705 CGTACTCA |
| v4.SA706 | CAAGCAGAAGACGGCATAACGAGAT <b>TACGCAG</b> AGTCAGTCAGCCGCGGTGTGTGCAAGGAGC         | SA706 TACGCAG  |
| v4.SA707 | CAAGCAGAAGACGGCATAACGAGAT <b>GGAGACTA</b> AGTCAGTCAGCCGCGGTGTGTGCAAGGAGC        | SA707 GGAGACTA |
| v4.SA708 | CAAGCAGAAGACGGCATAACGAGAT <b>GTCGCTCG</b> AGTCAGTCAGCCGCGGTGTGTGCAAGGAGC        | SA708 GTCGCTCG |
| v4.SA709 | CAAGCAGAAGACGGCATAACGAGAT <b>GTCGTAGT</b> AGTCAGTCAGCCGCGGTGTGTGCAAGGAGC        | SA709 GTCGTAGT |
| v4.SA710 | CAAGCAGAAGACGGCATAACGAGAT <b>TAGCAGAC</b> AGTCAGTCAGCCGCGGTGTGTGCAAGGAGC        | SA710 TAGCAGAC |
| v4.SA711 | CAAGCAGAAGACGGCATAACGAGAT <b>TCATAGAC</b> AGTCAGTCAGCCGCGGTGTGTGCAAGGAGC        | SA711 TCATAGAC |
| v4.SA712 | CAAGCAGAAGACGGCATAACGAGAT <b>TCGCTATA</b> AGTCAGTCAGCCGCGGTGTGTGCAAGGAGC        | SA712 TCGCTATA |
| MA.SB501 | AATGATACGGCGACCACCGAGATCTACAC <b>CTACTATA</b> TATGGTAATTGGAGGAATTGGCGGGGGAGCAC  | SB501 CTACTATA |
| MA.SB502 | AATGATACGGCGACCACCGAGATCTACAC <b>CGTACTA</b> TATGGTAATTGGAGGAATTGGCGGGGGAGCAC   | SB502 CGTACTA  |
| MA.SB503 | AATGATACGGCGACCACCGAGATCTACAC <b>AGAGTCAC</b> TATGGTAATTGGAGGAATTGGCGGGGGAGCAC  | SB503 AGAGTCAC |
| MA.SB504 | AATGATACGGCGACCACCGAGATCTACAC <b>TACGAGACT</b> TATGGTAATTGGAGGAATTGGCGGGGGAGCAC | SB504 TACGAGAC |
| MA.SB505 | AATGATACGGCGACCACCGAGATCTACAC <b>ACGTCTCG</b> TATGGTAATTGGAGGAATTGGCGGGGGAGCAC  | SB505 ACGTCTCG |
| MA.SB506 | AATGATACGGCGACCACCGAGATCTACAC <b>TCGACGAG</b> TATGGTAATTGGAGGAATTGGCGGGGGAGCAC  | SB506 TCGACGAG |
| MA.SB507 | AATGATACGGCGACCACCGAGATCTACAC <b>GATCGTGT</b> TATGGTAATTGGAGGAATTGGCGGGGGAGCAC  | SB507 GATCGTGT |
| MA.SB508 | AATGATACGGCGACCACCGAGATCTACAC <b>GTCAGATA</b> TATGGTAATTGGAGGAATTGGCGGGGGAGCAC  | SB508 GTCAGATA |

**Supplementary Table S3. Summary of sequencing data.**

| Note: All sequenced samples had a RIN value $\geq 8$ . |                    |               |                 |               |            |             |             |
|--------------------------------------------------------|--------------------|---------------|-----------------|---------------|------------|-------------|-------------|
| Sample                                                 | Archaeal sequences | Observed_OTUs | Good's coverage | PD_whole_tree | Shannon    | Simpson     | Chao1       |
| RS20.1                                                 | 19968              | 5124          | 0.777994792     | 97.67472      | 6.6300134  | 0.868649078 | 30442.37113 |
| RS20.2                                                 | 19620              | 4235          | 0.814576962     | 92.11002      | 5.91455497 | 0.861045439 | 22766.38095 |
| RS20.3                                                 | 18615              | 3703          | 0.832661832     | 81.75395      | 6.15344087 | 0.906350816 | 18906.93417 |
| RS20.5                                                 | 19698              | 4750          | 0.796273733     | 102.72981     | 6.90085274 | 0.919625275 | 26389.99462 |
| RL20.6                                                 | 19662              | 4370          | 0.813447259     | 89.6991       | 6.42011815 | 0.888324137 | 24208.57817 |
| RS38.1                                                 | 19930              | 3974          | 0.827094832     | 88.36312      | 5.22954033 | 0.784966605 | 22998.79167 |
| RS38.2                                                 | 19869              | 3816          | 0.835522674     | 84.77352      | 5.08225021 | 0.788157808 | 19846.86486 |
| RS38.3                                                 | 19920              | 4493          | 0.810040161     | 97.77648      | 6.90902777 | 0.92479527  | 24942.81714 |
| RS38.4                                                 | 19927              | 3865          | 0.835750489     | 87.86181      | 4.88322104 | 0.741656618 | 18656.79006 |
| RS41.1                                                 | 19900              | 3925          | 0.83120603      | 92.81598      | 5.58726942 | 0.839454923 | 21385.56037 |
| RS41.3                                                 | 19913              | 3765          | 0.834279114     | 92.72172      | 5.84345387 | 0.901587224 | 23925.55556 |
| RS41.4                                                 | 19928              | 4296          | 0.812826174     | 102.23677     | 6.41455697 | 0.924779608 | 24454.21739 |
| RS50.1                                                 | 19822              | 3661          | 0.840076682     | 89.23386      | 5.66460116 | 0.896695859 | 20348.25914 |
| RS50.2                                                 | 19955              | 3629          | 0.840240541     | 89.55929      | 5.54069873 | 0.88855184  | 24364.01224 |
| RS50.3                                                 | 19926              | 3638          | 0.841112115     | 87.37         | 5.14810723 | 0.80482683  | 21341.86926 |
| RS50.4                                                 | 19691              | 3681          | 0.837438424     | 88.6981       | 5.66936591 | 0.894374988 | 21651.52632 |
| RS60.1                                                 | 19971              | 4240          | 0.816383756     | 97.78417      | 6.2444095  | 0.897885966 | 27742.13636 |
| RS60.2                                                 | 19763              | 3747          | 0.836917472     | 88.50321      | 5.49492141 | 0.848461095 | 22906.60517 |
| RS60.3                                                 | 19868              | 3771          | 0.838634991     | 90.77904      | 5.70322742 | 0.876699251 | 19676.92879 |
| RS60.4                                                 | 19755              | 4104          | 0.824702607     | 96.35611      | 6.32777009 | 0.90575717  | 20801.64067 |
| RS50R.1                                                | 19919              | 4159          | 0.8177          | 99.73763      | 5.77132757 | 0.877544295 | 25456.54808 |
| RS50R.2                                                | 19836              | 4262          | 0.8131          | 102.91814     | 5.84498076 | 0.86214894  | 26792.49355 |
| RS50R.3                                                | 19929              | 4033          | 0.8238          | 99.9458       | 5.48650769 | 0.83920495  | 24385.54426 |
| RS60R.1                                                | 19597              | 4859          | 0.7935          | 118.80962     | 6.32374845 | 0.840792545 | 27179.37958 |
| RS60R.2                                                | 19950              | 4445          | 0.8058          | 109.39789     | 5.7001764  | 0.798001565 | 28083.82759 |
| RS60R.3                                                | 19908              | 3798          | 0.83465         | 96.61388      | 5.51805237 | 0.858100485 | 23251.63345 |
| RL1.4                                                  | 17819              | 4931          | 0.761995623     | 103.9779      | 7.0147111  | 0.887499296 | 29165.28571 |
| RL1.6                                                  | 14758              | 4359          | 0.746239328     | 90.78841      | 6.97468885 | 0.864394459 | 24562.57349 |
| RL1.7                                                  | 4119               | 1244          | 0.724447681     | 30.01824      | 5.97411188 | 0.882211833 | 10849.14925 |
| RL1.8                                                  | 1378               | 468           | 0.692307692     | 12.58724      | 5.55058551 | 0.876416885 | 4366.956522 |
| RL10.1                                                 | 19308              | 4830          | 0.786824114     | 100.44196     | 6.20450319 | 0.823159563 | 26999.29319 |
| RL10.2                                                 | 17531              | 4458          | 0.78557983      | 93.72509      | 6.20275122 | 0.793870484 | 23756.2541  |
| RL10.3                                                 | 18195              | 3508          | 0.836328662     | 82.33595      | 4.20533408 | 0.549595419 | 17715.54167 |
| RL10.4                                                 | 19818              | 5186          | 0.775456656     | 108.63497     | 6.79436525 | 0.899032762 | 28047.48961 |
| RL10.5                                                 | 19523              | 4902          | 0.783281258     | 108.22449     | 6.17503866 | 0.793647769 | 29828.3649  |
| RL10.6                                                 | 18107              | 5404          | 0.745954603     | 114.53023     | 6.8029011  | 0.801460208 | 30709.50239 |
| RL10.7                                                 | 19568              | 4934          | 0.781888798     | 104.0094      | 6.30623741 | 0.845078162 | 31327.55942 |
| RL20.1                                                 | 18749              | 4664          | 0.789802123     | 100.54643     | 6.17836326 | 0.803232308 | 23928.93797 |
| RL20.2                                                 | 19494              | 5020          | 0.776290141     | 112.94309     | 6.61064892 | 0.882491159 | 32338.90805 |
| RL20.3                                                 | 19672              | 5355          | 0.766012607     | 115.63167     | 7.30847661 | 0.927127833 | 33009.05483 |
| RL20.4                                                 | 14450              | 4131          | 0.758200692     | 92.00463      | 7.60071708 | 0.931856582 | 24746.78041 |
| RL20.5                                                 | 19614              | 5305          | 0.778270623     | 114.3287      | 7.30629563 | 0.897057328 | 25002.34583 |

|         |       |      |             |           |            |             |             |
|---------|-------|------|-------------|-----------|------------|-------------|-------------|
| RL20.6  | 19665 | 4667 | 0.79913552  | 102.21741 | 6.55328416 | 0.892629329 | 28591.15644 |
| RL38.1  | 19937 | 4877 | 0.791743994 | 103.10575 | 6.1538803  | 0.837199097 | 25058.44262 |
| RL38.2  | 19510 | 4883 | 0.785699641 | 101.03213 | 6.21489112 | 0.845748506 | 25347.37939 |
| RL38.3  | 18068 | 4723 | 0.779555014 | 98.8205   | 7.35159487 | 0.923146582 | 24698.19647 |
| RL38.4  | 19230 | 4834 | 0.785335413 | 103.43476 | 6.11291613 | 0.807648313 | 24597.63805 |
| RL41.1  | 19795 | 4327 | 0.811568578 | 99.16738  | 5.70296413 | 0.826899524 | 24543.81686 |
| RL41.2  | 19855 | 4345 | 0.812087635 | 98.07186  | 6.09733775 | 0.876399269 | 24631.63265 |
| RL41.3  | 19853 | 4369 | 0.81091019  | 103.04566 | 6.41109619 | 0.904732527 | 23204.24332 |
| RL41.4  | 19859 | 4643 | 0.800140994 | 103.55122 | 6.38658298 | 0.862396102 | 25811       |
| RL50.1  | 19041 | 3611 | 0.83703587  | 85.49753  | 5.5159767  | 0.854616319 | 20036.77816 |
| RL50.2  | 19727 | 3377 | 0.849039388 | 82.08482  | 4.92324112 | 0.828881208 | 21108.012   |
| RL50.3  | 18830 | 3718 | 0.82968667  | 87.03949  | 5.58824233 | 0.834752862 | 20518.06863 |
| RL50.4  | 18524 | 4042 | 0.809868279 | 90.22609  | 5.99033607 | 0.891041292 | 24043.55161 |
| RL60.1  | 17434 | 4276 | 0.787254789 | 94.29575  | 5.99215585 | 0.791209382 | 25565.43034 |
| RL60.2  | 16172 | 3242 | 0.825500866 | 77.75912  | 5.40899989 | 0.801547315 | 18551.35    |
| RL60.3  | 19819 | 4019 | 0.826176901 | 93.4682   | 5.21230135 | 0.759349834 | 21065.81034 |
| RL60.4  | 17973 | 4248 | 0.801535637 | 93.45577  | 6.11446    | 0.7673905   | 22063.01681 |
| RL50R.1 | 19879 | 5327 | 0.76685     | 108.82107 | 6.83019012 | 0.88327447  | 36924.24709 |
| RL50R.2 | 19370 | 4564 | 0.80135     | 113.07722 | 5.77509175 | 0.821125545 | 27172.53295 |
| RL50R.3 | 16338 | 3448 | 0.8544      | 85.22284  | 5.90999194 | 0.869396375 | 18216       |
| RL60R.1 | 19224 | 5008 | 0.7874      | 122.04957 | 6.82558391 | 0.865015735 | 28421.53886 |
| RL60R.2 | 19113 | 5017 | 0.7869      | 118.12161 | 6.69422773 | 0.859192195 | 27717.4775  |
| RL60R.3 | 5888  | 1197 | 0.835368755 | 36.75085  | 4.64883717 | 0.722232082 | 7312.943182 |
| RP20.2  | 19946 | 5280 | 0.779003309 | 111.96207 | 6.81385897 | 0.855896999 | 25473.40541 |
| RP20.3  | 18998 | 4496 | 0.801242236 | 102.40631 | 6.95703019 | 0.929619549 | 24076.21978 |
| RP20.5  | 19964 | 4794 | 0.798988179 | 107.53898 | 6.9329193  | 0.913551651 | 25277.65903 |
| RP20.6  | 19878 | 4723 | 0.802092766 | 105.81183 | 6.69329204 | 0.892710809 | 23545.89781 |
| RP38.1  | 19671 | 4150 | 0.820141325 | 96.11653  | 5.26347408 | 0.717973555 | 21725.71067 |
| RP38.2  | 19830 | 4313 | 0.813968734 | 97.43785  | 5.37024525 | 0.752336713 | 23804.44986 |
| RP38.3  | 19838 | 4671 | 0.802096986 | 104.4017  | 6.97163687 | 0.919824116 | 24376.30691 |
| RP38.4  | 19562 | 3480 | 0.8538493   | 83.63571  | 4.49295417 | 0.599687512 | 14765.94199 |
| RP41.1  | 19721 | 4432 | 0.811368592 | 98.9158   | 6.05740553 | 0.801406999 | 22078.27551 |
| RP41.2  | 19857 | 3413 | 0.856675228 | 78.51057  | 4.51335411 | 0.634965389 | 15497.8806  |
| RP41.3  | 19949 | 4432 | 0.808311194 | 104.92466 | 6.26850056 | 0.895960699 | 25930.75294 |
| RP41.4  | 19947 | 4642 | 0.799318193 | 108.33121 | 6.50496944 | 0.906404956 | 25339.68217 |
| RP50.1  | 19801 | 3568 | 0.847027928 | 86.78042  | 5.33362045 | 0.810249024 | 17943.88088 |
| RP50.2  | 19952 | 3480 | 0.850791901 | 83.62952  | 5.08340295 | 0.816687747 | 18099.72277 |
| RP50.3  | 19935 | 3743 | 0.838274392 | 89.26596  | 5.08817511 | 0.803238446 | 20611.42857 |
| RP50.4  | 19257 | 4622 | 0.797735888 | 109.33845 | 6.46253164 | 0.873533663 | 22808.00719 |
| RP60.1  | 18336 | 3960 | 0.814626963 | 97.60942  | 5.78196642 | 0.813807651 | 22351.40446 |
| RP60.2  | 16447 | 3189 | 0.830729008 | 77.20689  | 5.49987557 | 0.824117667 | 19397.93724 |
| RP60.3  | 19847 | 4283 | 0.818511614 | 102.61681 | 5.98404453 | 0.825684141 | 21084.55699 |
| RP60.4  | 19489 | 4423 | 0.803324953 | 107.10819 | 6.39004335 | 0.8998143   | 27517.42767 |
| RP50R.1 | 19928 | 4261 | 0.8157      | 101.03029 | 5.33232136 | 0.735302875 | 25093.68405 |
| RP50R.2 | 19859 | 4574 | 0.79895     | 109.49342 | 5.96759647 | 0.86486709  | 29366.05521 |
| RP50R.3 | 19866 | 4159 | 0.8181      | 101.77661 | 5.39136685 | 0.816320355 | 26661.39116 |

|         |       |      |             |           |            |             |             |
|---------|-------|------|-------------|-----------|------------|-------------|-------------|
| RP60R.1 | 19257 | 5464 | 0.7614      | 136.99837 | 6.99323744 | 0.91230531  | 33502.43842 |
| RP60R.2 | 19840 | 4844 | 0.78795     | 116.38394 | 5.95387387 | 0.83763839  | 29143.78378 |
| RP60R.3 | 15708 | 3602 | 0.8435      | 99.65176  | 6.1340372  | 0.91766687  | 20429.78351 |
| RE1.1   | 753   | 276  | 0.665338645 | 8.06849   | 5.57359124 | 0.913967856 | 3438.6      |
| RE1.2   | 645   | 226  | 0.691472868 | 6.42644   | 5.14338509 | 0.859232017 | 1867.75     |
| RE1.3   | 781   | 272  | 0.693982074 | 7.38593   | 5.30975195 | 0.87301975  | 2049.5625   |
| RE1.4   | 622   | 190  | 0.726688103 | 5.81662   | 4.7868059  | 0.862124048 | 2584.166667 |
| RE1.5   | 203   | 74   | 0.669950739 | 2.82009   | 4.2511278  | 0.837778155 | 2285        |
| RE1.6   | 385   | 140  | 0.677922078 | 4.28463   | 5.09973382 | 0.91255861  | 1411        |
| RE1.7   | 578   | 114  | 0.822827939 | 4.75523   | 3.31891681 | 0.716413839 | 1185.2      |
| RE1.8   | 78    | 40   | 0.538461538 | 1.88877   | 4.18155887 | 0.872781065 | 355         |
| RE10.1  | 12293 | 2918 | 0.803465387 | 62.18466  | 5.50850992 | 0.738500705 | 13565.15328 |
| RE10.2  | 685   | 216  | 0.709489051 | 5.76039   | 4.96201222 | 0.8918749   | 2405        |
| RE10.3  | 5603  | 1454 | 0.768873818 | 35.09602  | 5.6263376  | 0.861297597 | 10763.61111 |
| RE10.4  | 6251  | 1449 | 0.791393377 | 34.04721  | 4.82876847 | 0.781657613 | 10994.57303 |
| RE10.5  | 1452  | 417  | 0.732093664 | 10.53838  | 4.24485635 | 0.717456306 | 5448.066667 |
| RE10.6  | 839   | 294  | 0.675804529 | 7.50167   | 4.74166169 | 0.789241975 | 3129.076923 |
| RE10.7  | 788   | 270  | 0.680203046 | 6.24898   | 4.34855692 | 0.716512278 | 3145.090909 |
| RE20.1  | 8773  | 1843 | 0.818762111 | 43.5946   | 5.2347126  | 0.82187071  | 11063.83942 |
| RE20.2  | 7981  | 2158 | 0.770956021 | 48.0313   | 5.99369889 | 0.81822533  | 11645.94318 |
| RE20.3  | 4581  | 1223 | 0.76315215  | 30.28031  | 5.9790584  | 0.908972889 | 9390.638889 |
| RE20.4  | 1405  | 433  | 0.732384342 | 10.91814  | 5.74181498 | 0.893847849 | 2783        |
| RE20.5  | 2478  | 795  | 0.719935432 | 18.94292  | 6.14816626 | 0.919221677 | 4941.051724 |
| RE20.6  | 3233  | 944  | 0.749149397 | 20.90895  | 5.76198509 | 0.865990407 | 5570.126761 |
| RE38.1  | 18015 | 3519 | 0.830585623 | 81.47429  | 5.23140061 | 0.823998178 | 20087.7758  |
| RE38.2  | 4953  | 1067 | 0.807389461 | 25.01325  | 4.90010234 | 0.84765738  | 7294.136986 |
| RE38.3  | 15823 | 3510 | 0.811540163 | 80.17534  | 6.51776605 | 0.921820578 | 18525.78041 |
| RE38.4  | 18407 | 4123 | 0.812245341 | 87.6725   | 5.9938213  | 0.860349592 | 20215.29111 |
| RE41.1  | 16448 | 3092 | 0.837609436 | 73.65451  | 4.99215449 | 0.778271388 | 16153.48352 |
| RE41.2  | 13051 | 2629 | 0.821699487 | 61.66031  | 5.26885149 | 0.843056006 | 17498.78571 |
| RE41.3  | 13232 | 2833 | 0.80887243  | 70.6316   | 5.95813389 | 0.919632922 | 19836.48936 |
| RE41.4  | 9209  | 1905 | 0.813009013 | 48.01209  | 5.572668   | 0.901173755 | 14253.175   |
| RE50.1  | 17835 | 3452 | 0.830613961 | 82.04119  | 5.49472649 | 0.865690365 | 20731.20455 |
| RE50.2  | 13677 | 2386 | 0.845726402 | 60.06225  | 5.13639258 | 0.886316093 | 15100.25714 |
| RE50.3  | 16019 | 3244 | 0.831200449 | 76.18178  | 6.81032201 | 0.936091736 | 17861.824   |
| RE50.4  | 16793 | 3727 | 0.808789377 | 84.49959  | 6.10688252 | 0.901224688 | 20792.08278 |
| RE60.1  | 14572 | 3563 | 0.788086742 | 81.59319  | 6.67009987 | 0.91617026  | 21965.81081 |
| RE60.2  | 18014 | 3424 | 0.837681803 | 81.07145  | 5.30923946 | 0.837625773 | 18366.04895 |
| RE60.3  | 16082 | 3521 | 0.807711505 | 81.43344  | 5.81384904 | 0.872385285 | 21852.35521 |
| RE60.4  | 18028 | 3259 | 0.845518083 | 78.27065  | 5.05118903 | 0.81359673  | 17204.03597 |
| RE50R.1 | 11725 | 4140 | 0.8256      | 83.50806  | 6.85702732 | 0.94318104  | 21921.66082 |
| RE50R.2 | 8076  | 2946 | 0.87545     | 65.3579   | 5.66119912 | 0.89541943  | 16371.51948 |
| RE50R.3 | 17140 | 4229 | 0.8148      | 104.04129 | 6.00911109 | 0.881679435 | 26714.10164 |
| RE60R.1 | 13074 | 4231 | 0.82195     | 100.48268 | 6.40639455 | 0.887999025 | 21838.16667 |
| RE60R.2 | 15105 | 4483 | 0.81575     | 101.72639 | 6.51220464 | 0.86037414  | 20644.35714 |
| RE60R.3 | 18055 | 4233 | 0.8169      | 105.59254 | 6.23331229 | 0.894760285 | 24065.22189 |

**Supplementary Figure S1. Composition of methanogen communities at genus level in RS (A), RL (B), RP (C), and RE (D) across individuals during rumen development.**

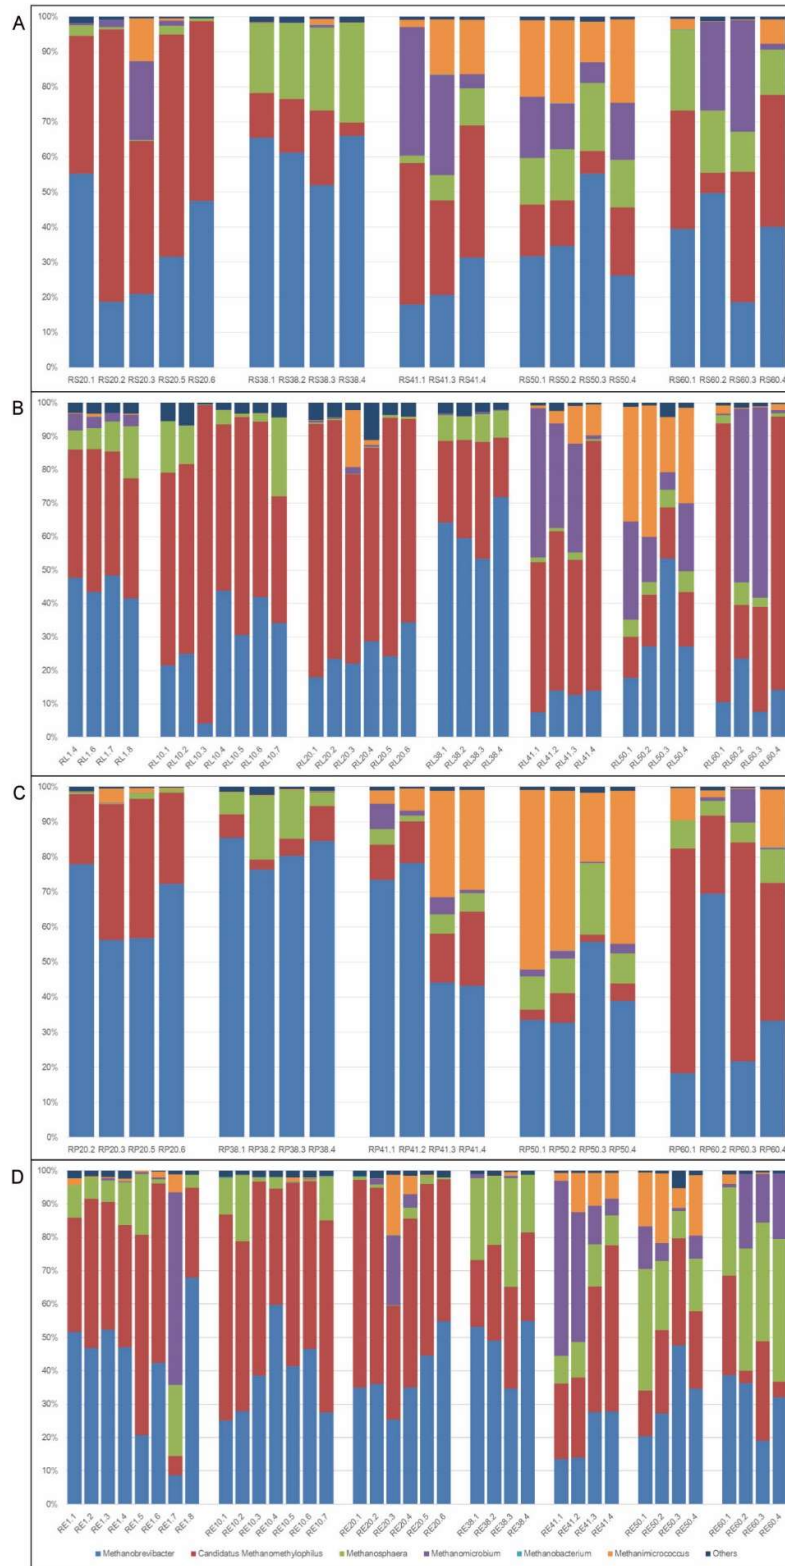

**Supplementary Figure S2. Composition of methanogen communities at genus level in four fractions of control diet treatment and rhubarb supplementation treatment across individuals on 50 d (A) and 60 d (B).**

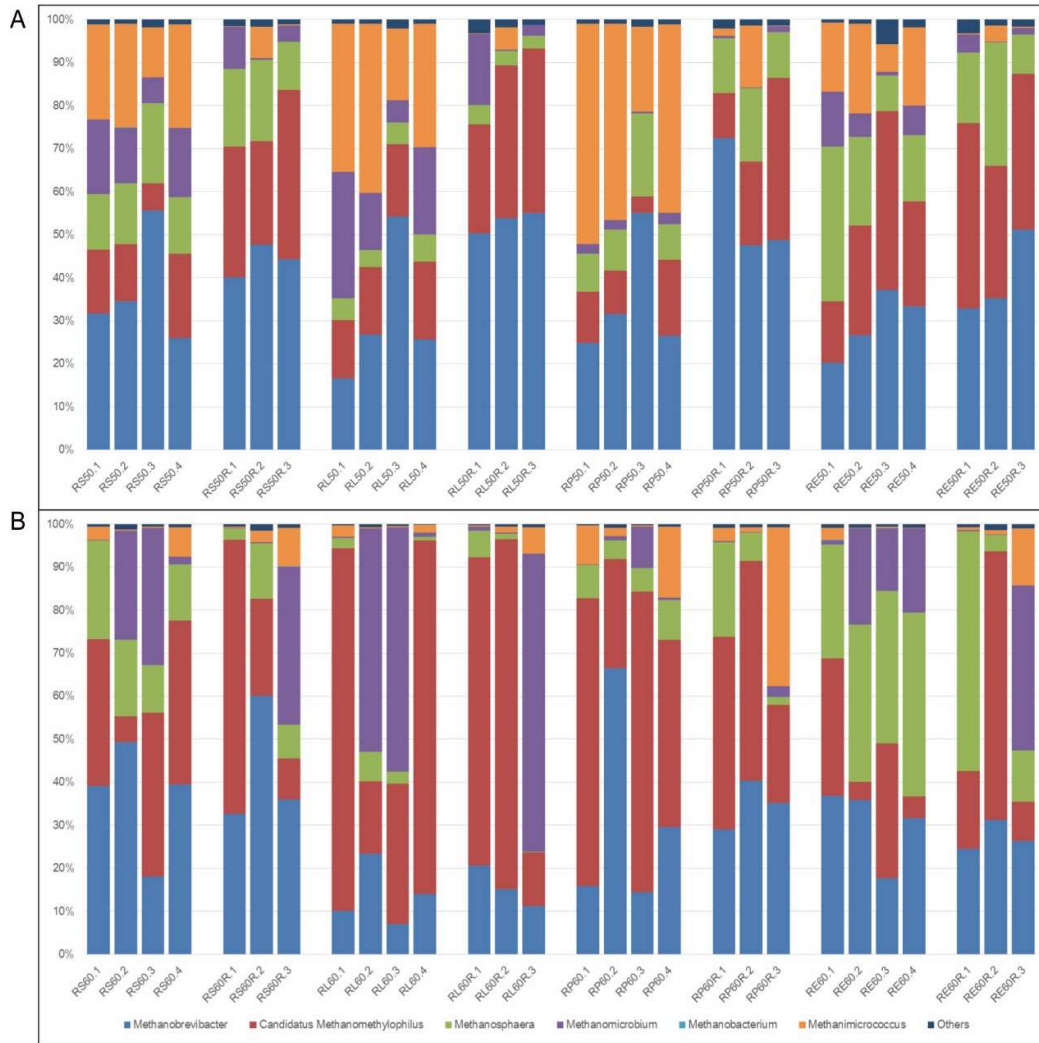



**Supplementary Figure S3. Comparison of Chao 1 index of methanogen communities within different fractions on different days.** The horizontal lines in each box indicate the median values, and the 75<sup>th</sup> and 25<sup>th</sup> quartile values are respectively represented by the top and bottom sides of each box.

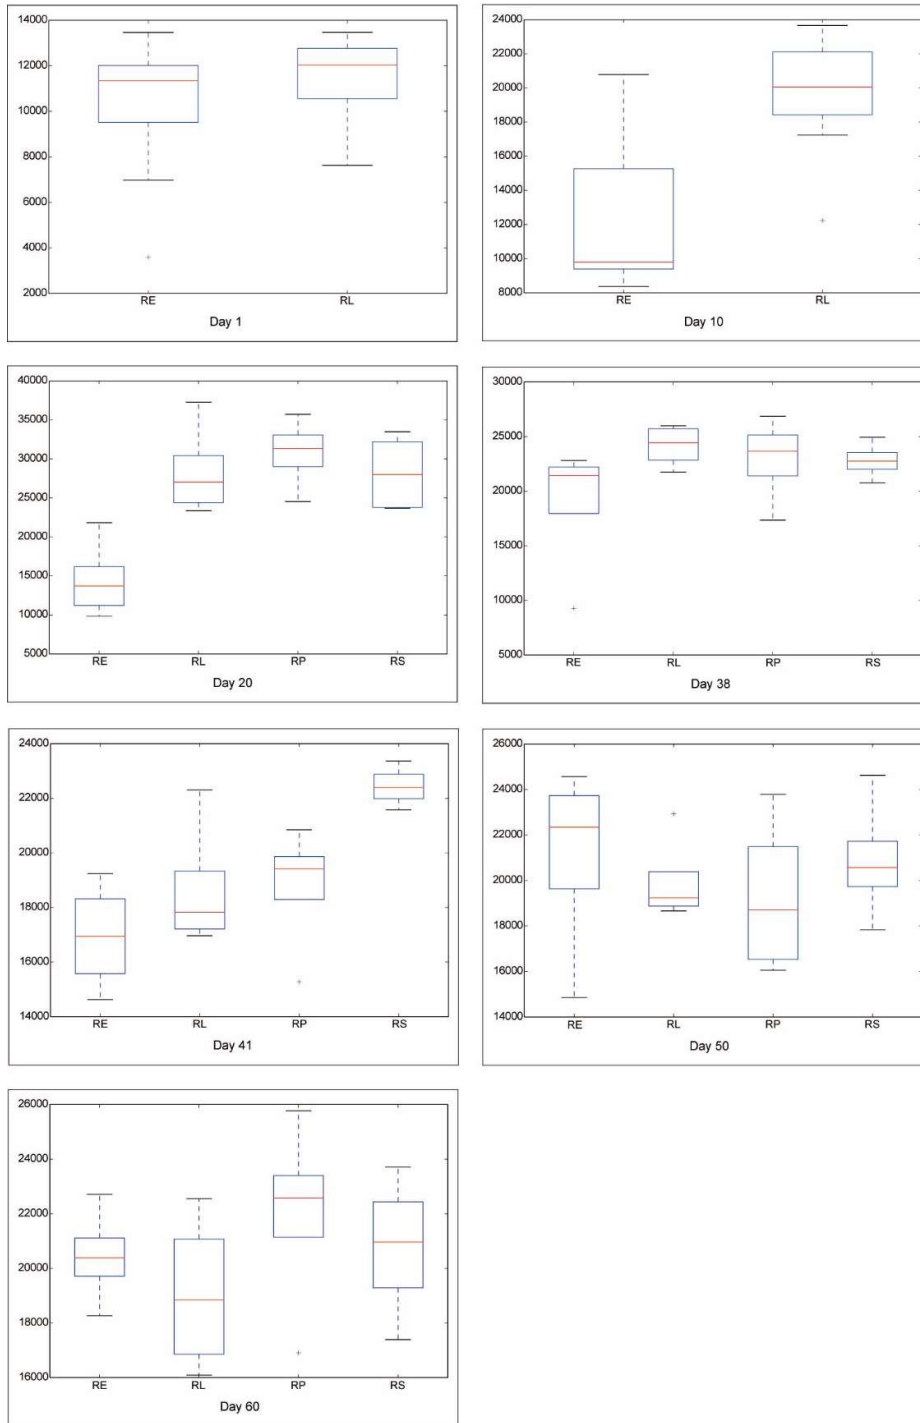

**Supplementary Figure S4. Principal coordinate analysis (PCoA) of methanogen community structure using unweighted Unifrac matrix within different fractions on different days.**

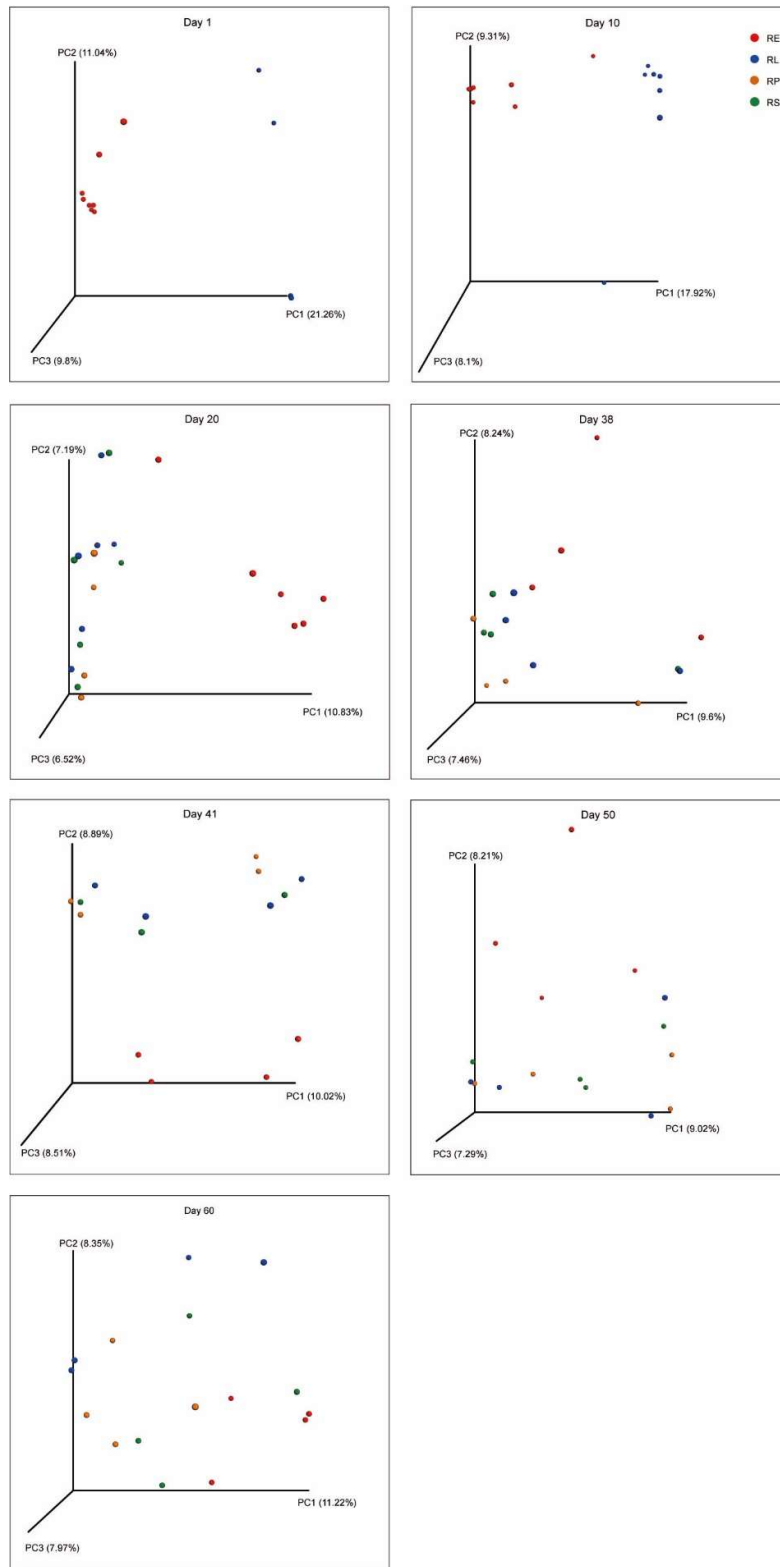

**Supplementary Figure S5. Management of goats and sampling from four fractions during rumen development.**

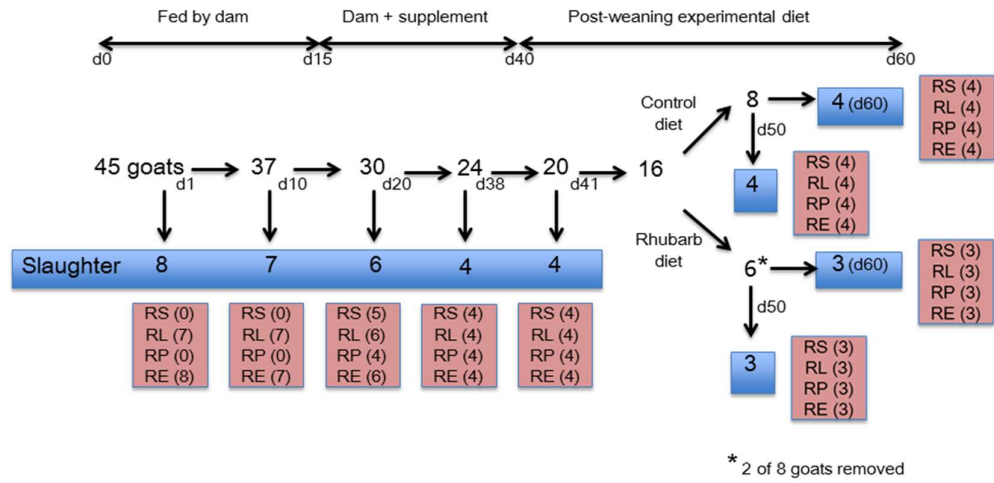

**Supplementary Figure S6. Increase in body weight of black goats during rumen development.**

Note: There was no significant difference ( $P=0.736$ ) in body weight between the control diet treatment and the rhubarb supplementation treatment.

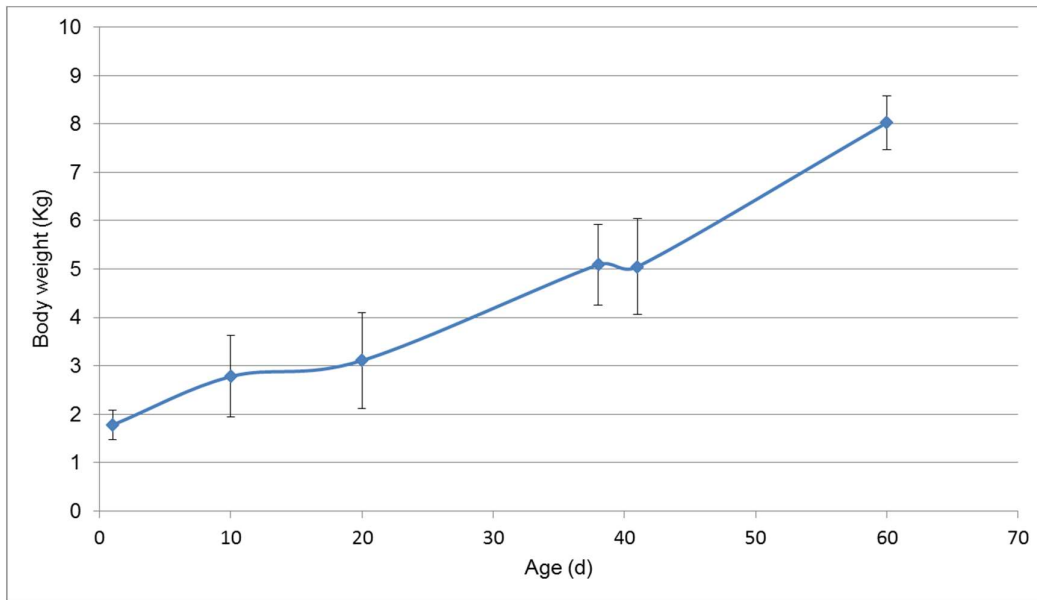

Supplement: 41598_2017_500_MOESM1_ESM.pdf [file 41598_2017_500_MOESM1_ESM.pdf]
